# Supplementary material for: Impact of Nanoclays Addition on Chickpea (Cicer arietinum L.) Flour Film Properties
Source: MDPI journal article supplement (doi:10.3390/foods13010075), 2023-12-25
Supplement: s1 [file s1]

# Supplementary materials. Figure S1

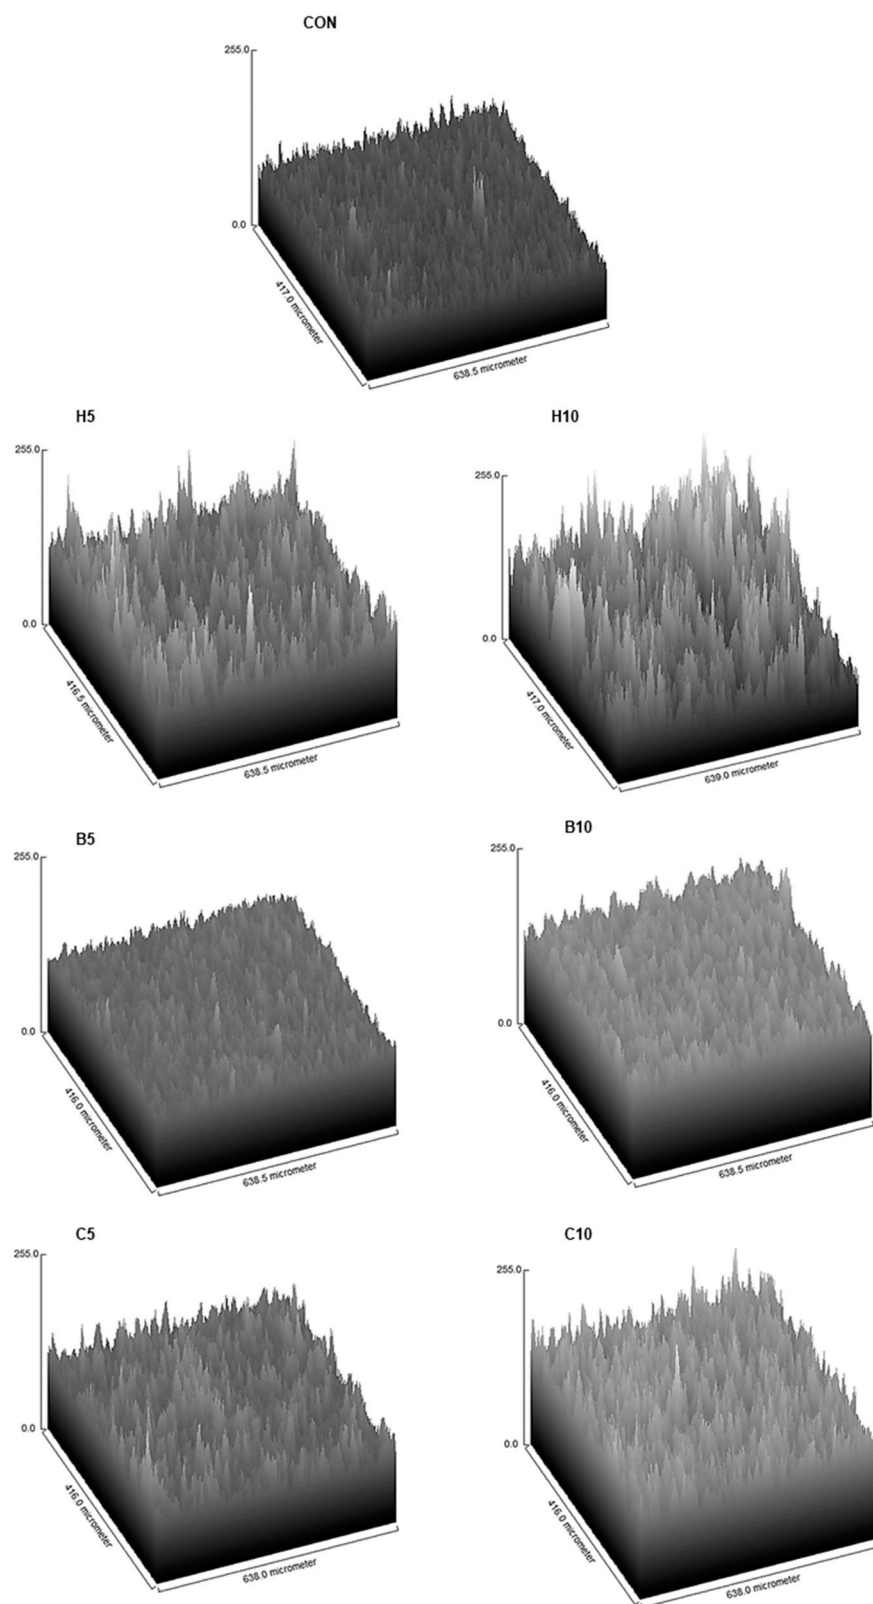

**Figure S1.** Surface roughness measured from SEM images of chickpea flour films added of nanoclays. CON, control film; H5, film with 5% halloysite; H10, film with 10% halloysite; B5, film with 5% bentonite; B10, film with 10% bentonite; C5, film with 5% Cloisite 20A; C10, film with 10% Cloisite 20A.
